# Supplementary material for: Synthesis, characterization, and luminescence modulation of a rare barium-tetracarboxylate framework with I2O1 connectivity
Source: Royal Society of Chemistry journal article supplement (doi:10.1039/c4ce01059k), 2014-01-01
Supplement: c4ce01059k1.pdf [file c4ce01059k1.pdf]

## Supporting Information

### **Synthesis, characterization, and luminescence modulation of a barium-tetracarboxylate framework with I<sup>2</sup>O<sup>1</sup> connectivity**

**Xiao Chen<sup>a</sup> Sha He<sup>a</sup> Feiyan Chen<sup>a</sup> Yunlong Feng<sup>\*a</sup>**

Zhejiang Key Laboratory for Reactive Chemistry on Solid Surfaces, Institute of Physical Chemistry, Zhejiang Normal University, Jinhua, Zhejiang 321004, PR China

#### **1. General remark**

All reagents and solvents were used as received from commercial suppliers without further purification. The elemental analyses of C and H were performed on a Perkin-Elmer 2400 II elemental analyzer. NMR spectra were recorded on a Bruker AV400 MHz spectrometer. IR spectrum was measured in KBr pellets on a Nicolet 5DX FT-IR spectrometer. The thermogravimetric measurement was performed on preweighed samples in an oxygen stream using a Netzsch STA449C apparatus with a heating rate of 10 °C/min. Powder X-ray diffraction data were obtained using a Philips PW3040/60 automated powder diffractometer, using Cu-K $\alpha$  radiation ( $\lambda = 1.542 \text{ \AA}$ ) with a  $2\theta$  range of 5–30°. The varied temperature PXRD patterns were recorded using Bruker D8 ADVANCE. The excitation and luminescence spectra were performed on a HITACHI-F-2500 fluorescence spectrometer in solid state at room temperature. The diffraction data was collected on a Bruker APEX II diffractometer equipped with a graphite-monochromatized Mo-K $\alpha$  radiation ( $\lambda = 0.71073 \text{ \AA}$ ) at 296(2) K. Data intensity was corrected by Lorentz-polarization factors and empirical absorption. The structures were solved by direct methods and expanded with difference Fourier techniques. All calculations were performed using SHELXS-97 and SHELXL-97 program packages.

#### **2. Synthesis and characterization of the organic building block (H<sub>4</sub>L)**

The ligand biphenyl-3,3',5,5'-tetra-(phenyl-4-carboxylic acid) was synthesized using a Suzuki coupling reaction. biphenyl-3,3',5,5'-tetrabromide (1.00g, 2.13mmol), 4-(methoxycarbonyl)phenylboronic acid (2.32g, 29.01mmol) and Na<sub>2</sub>CO<sub>3</sub>(3.61g, 34.05mmol) were mixed in 75 mL of 2:2:1 PhCH<sub>3</sub>/ MeOH/H<sub>2</sub>O, and the mixture was de-aerated under Ar for 20 min.

[Pd(PPh<sub>3</sub>)<sub>4</sub>] (0.5g, 0.22mmol) was added to the reaction mixture with stirring and the mixture heated to 90 °C for three days under N<sub>2</sub>. The product Me<sub>4</sub>L was isolated by conventional extraction procedures. The final product H<sub>4</sub>L was obtained by hydrolysis of the crude product Me<sub>4</sub>L with 6M aqueous NaOH, followed by acidification with concentrated HCl. Yield: 0.85g, 85%. Elemental analyses (percentage calculated/found) for H<sub>4</sub>L ( C 75.7/75.3, H 4.13/4.17). Mass (ESI) m/z (M–H<sup>+</sup>): 633.16. <sup>1</sup>H NMR (DMSO-*d*<sub>6</sub>, 300 MHz): δ = 13.03 (s, 4H), 8.25 (d, 4H, *J* = 0.8 Hz), 8.09 (m, 18H); <sup>13</sup>C NMR (DMSO-*d*<sub>6</sub>, 100 MHz): 167.65, 144.50, 142.07, 141.14, 130.42, 130.34, 127.98, 126.41, 125.69; Selected infrared (KBr, cm<sup>-1</sup>): 3671, 2974, 2467, 1943, 1657, 1592, 1544, 1394, 1198, 1055, 1019, 858, 787, 733, 692, 668, 554.

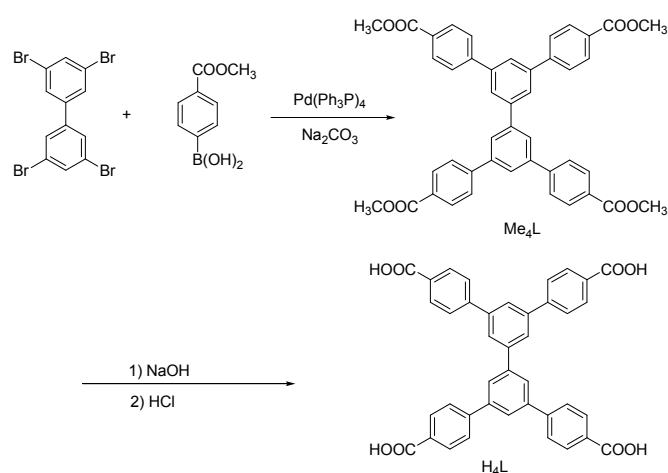

**Scheme S1** The synthetic route to the organic linker H<sub>4</sub>L.

### 3. Synthesis and characterization of the compound

The organic linker H<sub>4</sub>L (10.0 mg, 15.7 μmol) and Ba(NO<sub>3</sub>)<sub>2</sub> (30.0 mg, 44.5 μmol) were dissolved in 4 mL of 1:1 DMF/H<sub>2</sub>O in a disposable scintillation vial (20 mL). The vial was capped tightly and placed at an oven at 140 °C for 48 h. The colourless block-shaped crystals were collected by filtration and washed with DMF in 26.1% yield. The compound can be characterized by the single-crystal X-ray structure determination, TGA, PXRD and microanalysis. Elemental analysis (percentage calculated/found): for [Ba<sub>5</sub>(L)<sub>3</sub>(H<sub>2</sub>O)<sub>6</sub>]·25H<sub>2</sub>O·10DMF·2Me<sub>2</sub>NH<sub>2</sub><sup>+</sup> (C 46.7/47.1, H 5.40/5.44, N 4.24/4.30). Selected infrared (KBr, cm<sup>-1</sup>): 3392, 2971, 1751, 1652, 1646, 1586, 1540, 1395, 1184, 1091, 1045, 854, 788, 723, 670, 459.

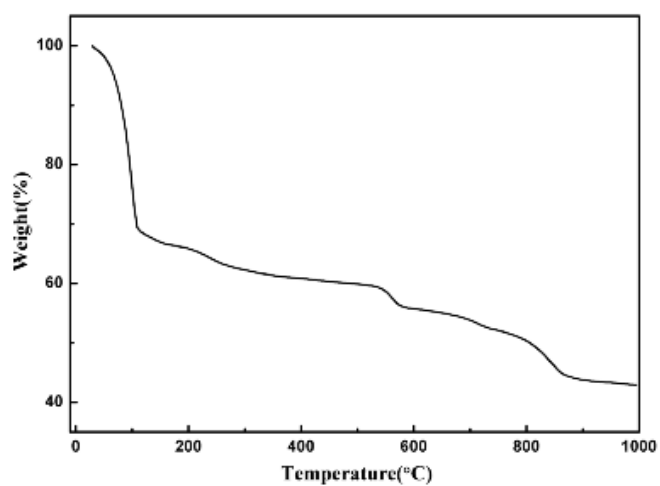

*Fig. S1* TGA curves of the compound.

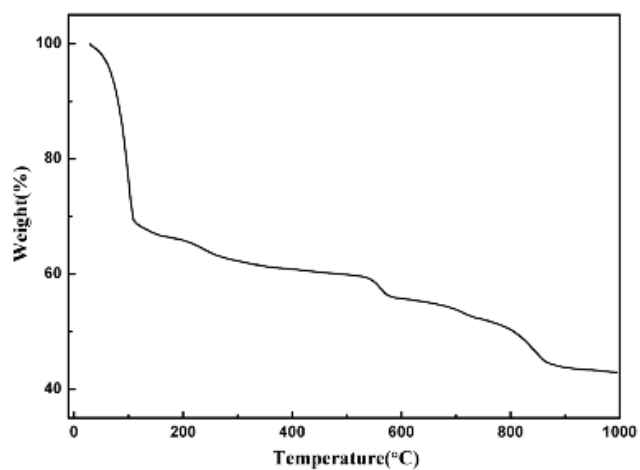

*Fig. S2* PXRD patterns of the compound, along with the simulated XRD patterns (black) from their single-crystal X-ray structures and experimental patterns (red).

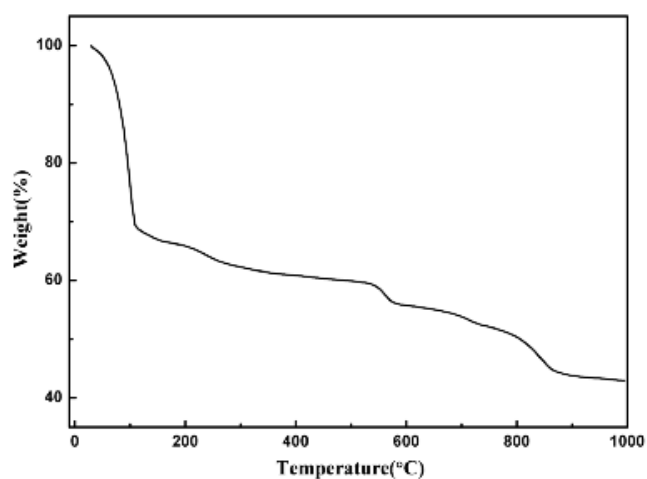

Fig. S3 PXRD patterns of the simulated from single X-ray crystal structure (black) and thermally activated the MOF at different temperatures.

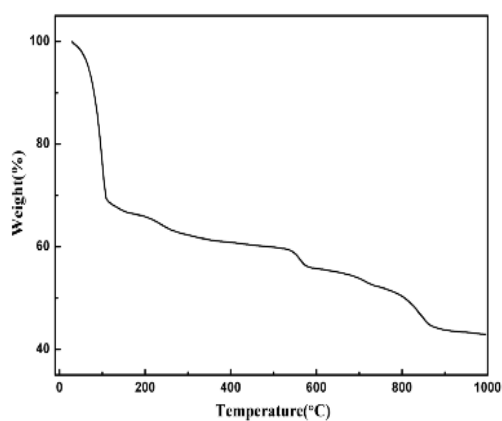

Fig. S4 Photoluminescent spectra of H<sub>4</sub>L and the compound in solid state at room temperature.

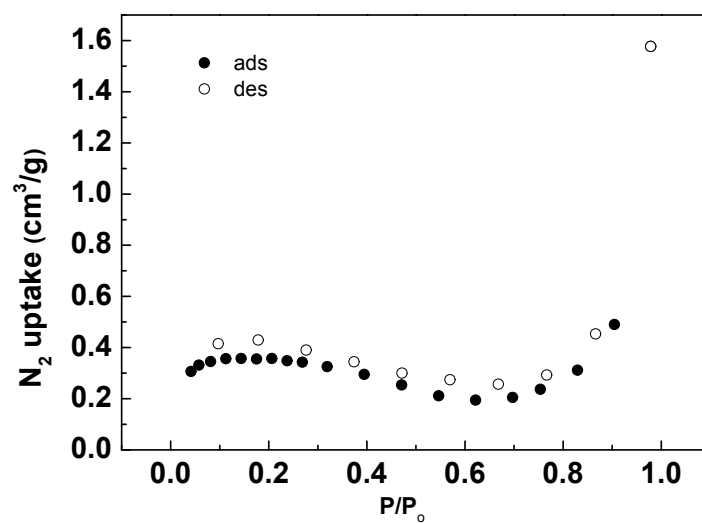

**Fig. S5** The N<sub>2</sub> adsorption-desorption isotherms at 77 K. The sample was guest exchanged with dry acetone and evacuated under high vacuum at 60 °C to obtain the activated sample.

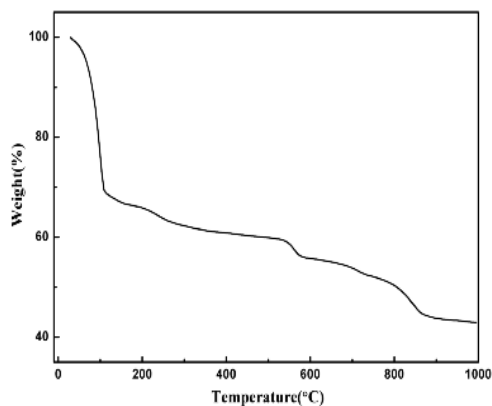

**Fig. S6** FTIR spectra of the compound (red), H<sub>4</sub>L (black).

**Table S1** Crystal data and structure refinement for the compound

|                                                     |                                                                                                                                              |
|-----------------------------------------------------|----------------------------------------------------------------------------------------------------------------------------------------------|
| Empirical formula                                   | C <sub>154</sub> H <sub>214</sub> Ba <sub>5</sub> N <sub>12</sub> O <sub>65</sub>                                                            |
| Formula weight                                      | 3960.07                                                                                                                                      |
| Temperature (K)                                     | 296(2) K                                                                                                                                     |
| Wavelength (Å)                                      | 0.71073 Å                                                                                                                                    |
| Crystal system, Space group                         | Hexagonal, <i>P</i> 6/m                                                                                                                      |
| Unit cell dimensions                                | $a = 15.0263(3)$ Å<br>$b = 15.0263(3)$ Å<br>$c = 17.6363(6)$ Å<br>$\alpha = 90.00^\circ$<br>$\beta = 90.00^\circ$<br>$\gamma = 120.00^\circ$ |
| Volume (Å <sup>3</sup> )                            | 3448.59(15)                                                                                                                                  |
| <i>Z</i> , Calculated density (g cm <sup>-3</sup> ) | 1, 1.907                                                                                                                                     |
| Absorption coefficient (mm <sup>-1</sup> )          | 1.522                                                                                                                                        |
| <i>F</i> (000)                                      | 2022                                                                                                                                         |
| Crystal color                                       | colourless                                                                                                                                   |

|                                                       |                                                                         |
|-------------------------------------------------------|-------------------------------------------------------------------------|
| $\theta$ range for data collection (°)                | 1.94 to 27.48                                                           |
| Limiting indices                                      | -19 $\leq$ h $\leq$ 16, -19 $\leq$ k $\leq$ 19, -22 $\leq$ l $\leq$ 22  |
| Reflections collected / unique / observed reflections | 25665 / 2685 (R <sub>int</sub> = 0.0779) / 1973<br>[I > 2 $\sigma$ (I)] |
| Completeness to theta = 27.48                         | 98.0 %                                                                  |
| Absorption correction                                 | Empirical                                                               |
| Refinement method                                     | Full-matrix least-squares on F <sup>2</sup>                             |
| parameters                                            | 124                                                                     |
| Goodness-of-fit (on F <sup>2</sup> )                  | 1.000                                                                   |
| Final R indices [I > 2 $\sigma$ (I)]                  | R = 0.0504, wR = 0.1651                                                 |
| R indices (all data)                                  | R = 0.0772, wR = 0.1785                                                 |
| Largest diff. peak / hole (e Å <sup>-3</sup> )        | 1.405 / -1.243                                                          |
| CCDC                                                  | 1001306                                                                 |

**Table S2** Selected bond lengths and bond angles for the compound

| Bond                 | Dist(Å)    | Bond                 | Dist(Å)    |
|----------------------|------------|----------------------|------------|
| Ba(1)-O(2)#1         | 2.812(5)   | Ba(1)-C(13)          | 3.214(6)   |
| Ba(1)-O(2)#2         | 2.812(5)   | Ba(2)-O(1)#4         | 2.771(4)   |
| Ba(1)-O(2)#3         | 2.812(5)   | Ba(2)-O(1)#5         | 2.771(4)   |
| Ba(1)-O(2)           | 2.812(5)   | Ba(2)-O(1)#2         | 2.771(4)   |
| Ba(1)-O(1W)          | 2.840(8)   | Ba(2)-O(1)           | 2.771(4)   |
| Ba(1)-O(1W)#3        | 2.840(8)   | Ba(2)-O(1)#6         | 2.771(4)   |
| Ba(1)-O(1)#3         | 2.896(4)   | Ba(2)-O(1)#7         | 2.771(4)   |
| Ba(1)-O(1)           | 2.896(4)   | Ba(2)-O(1W)          | 2.945(8)   |
| Ba(1)-O(1)#1         | 2.896(4)   | Ba(2)-O(1W)#4        | 2.945(8)   |
| Ba(1)-O(1)#2         | 2.896(4)   | Ba(2)-O(1W)#7        | 2.945(8)   |
| Angle                | (°)        | Angle                | (°)        |
| O(2)#1-Ba(1)-O(2)#2  | 180.0(3)   | O(1W)#3-Ba(1)-O(1)#2 | 112.45(17) |
| O(2)#1-Ba(1)-O(2)#3  | 102.6(3)   | O(1)#3-Ba(1)-O(1)#2  | 111.79(18) |
| O(2)#2-Ba(1)-O(2)#3  | 77.4(3)    | O(1)-Ba(1)-O(1)#2    | 68.21(18)  |
| O(2)#1-Ba(1)-O(2)    | 77.4(3)    | O(1)#1-Ba(1)-O(1)#2  | 180.00(19) |
| O(2)#2-Ba(1)-O(2)    | 102.6(3)   | O(1)#4-Ba(2)-O(1)#5  | 71.75(19)  |
| O(2)#3-Ba(1)-O(2)    | 180.0(2)   | O(1)#4-Ba(2)-O(1)#2  | 132.20(6)  |
| O(2)#1-Ba(1)-O(1W)   | 70.47(14)  | O(1)#5-Ba(2)-O(1)#2  | 89.13(14)  |
| O(2)#2-Ba(1)-O(1W)   | 109.53(14) | O(1)#4-Ba(2)-O(1)    | 89.13(14)  |
| O(2)#3-Ba(1)-O(1W)   | 70.47(14)  | O(1)#5-Ba(2)-O(1)    | 132.20(6)  |
| O(2)-Ba(1)-O(1W)     | 109.53(14) | O(1)#2-Ba(2)-O(1)    | 71.75(19)  |
| O(2)#1-Ba(1)-O(1W)#3 | 109.53(14) | O(1)#4-Ba(2)-O(1)#6  | 89.13(14)  |

|                      |            |                       |           |
|----------------------|------------|-----------------------|-----------|
| O(2)#2-Ba(1)-O(1W)#3 | 70.47(14)  | O(1)#5-Ba(2)-O(1)#6   | 132.20(6) |
| O(2)#3-Ba(1)-O(1W)#3 | 109.53(14) | O(1)#2-Ba(2)-O(1)#6   | 132.20(6) |
| O(2)-Ba(1)-O(1W)#3   | 70.47(14)  | O(1)-Ba(2)-O(1)#6     | 89.13(14) |
| O(1W)-Ba(1)-O(1W)#3  | 180.0(5)   | O(1)#4-Ba(2)-O(1)#7   | 132.20(6) |
| O(2)#1-Ba(1)-O(1)#3  | 100.21(17) | O(1)#5-Ba(2)-O(1)#7   | 89.13(14) |
| O(2)#2-Ba(1)-O(1)#3  | 79.79(17)  | O(1)#2-Ba(2)-O(1)#7   | 89.13(14) |
| O(2)#3-Ba(1)-O(1)#3  | 45.73(14)  | O(1)-Ba(2)-O(1)#7     | 132.20(6) |
| O(2)-Ba(1)-O(1)#3    | 134.27(14) | O(1)#6-Ba(2)-O(1)#7   | 71.75(19) |
| O(1W)-Ba(1)-O(1)#3   | 112.45(17) | O(1)#4-Ba(2)-O(1W)    | 64.45(17) |
| O(1W)#3-Ba(1)-O(1)#3 | 67.55(17)  | O(1)#5-Ba(2)-O(1W)    | 64.45(17) |
| O(2)#1-Ba(1)-O(1)    | 79.79(17)  | O(1)#2-Ba(2)-O(1W)    | 67.76(16) |
| O(2)#2-Ba(1)-O(1)    | 100.21(17) | O(1)-Ba(2)-O(1W)      | 67.76(16) |
| O(2)#3-Ba(1)-O(1)    | 134.27(14) | O(1)#6-Ba(2)-O(1W)    | 144.07(9) |
| O(2)-Ba(1)-O(1)      | 45.73(14)  | O(1)#7-Ba(2)-O(1W)    | 144.07(9) |
| O(1W)-Ba(1)-O(1)     | 67.55(17)  | O(1)#4-Ba(2)-O(1W)#4  | 67.76(16) |
| O(1W)#3-Ba(1)-O(1)   | 112.45(17) | O(1)#5-Ba(2)-O(1W)#4  | 67.76(16) |
| O(1)#3-Ba(1)-O(1)    | 180.0(2)   | O(1)#2-Ba(2)-O(1W)#4  | 144.07(9) |
| O(2)#1-Ba(1)-O(1)#1  | 45.73(14)  | O(1)-Ba(2)-O(1W)#4    | 144.07(9) |
| O(2)#2-Ba(1)-O(1)#1  | 134.27(14) | O(1)#6-Ba(2)-O(1W)#4  | 64.45(17) |
| O(2)#3-Ba(1)-O(1)#1  | 100.21(17) | O(1)#7-Ba(2)-O(1W)#4  | 64.45(17) |
| O(2)-Ba(1)-O(1)#1    | 79.79(17)  | O(1W)-Ba(2)-O(1W)#4   | 120       |
| O(1W)-Ba(1)-O(1)#1   | 112.45(17) | O(1)#4-Ba(2)-O(1W)#7  | 144.07(9) |
| O(1W)#3-Ba(1)-O(1)#1 | 67.55(17)  | O(1)#5-Ba(2)-O(1W)#7  | 144.07(9) |
| O(1)#3-Ba(1)-O(1)#1  | 68.21(18)  | O(1)#2-Ba(2)-O(1W)#7  | 64.45(17) |
| O(1)-Ba(1)-O(1)#1    | 111.79(18) | O(1)-Ba(2)-O(1W)#7    | 64.45(17) |
| O(2)#1-Ba(1)-O(1)#2  | 134.27(14) | O(1)#6-Ba(2)-O(1W)#7  | 67.76(16) |
| O(2)#2-Ba(1)-O(1)#2  | 45.73(14)  | O(1)#7-Ba(2)-O(1W)#7  | 67.76(16) |
| O(2)#3-Ba(1)-O(1)#2  | 79.79(17)  | O(1W)-Ba(2)-O(1W)#7   | 120       |
| O(2)-Ba(1)-O(1)#2    | 100.21(17) | O(1W)#4-Ba(2)-O(1W)#7 | 120       |
| O(1W)-Ba(1)-O(1)#2   | 67.55(17)  |                       |           |

Symmetry transformations used to generate equivalent atoms: #1 -x+1,-y,-z #2 -x+1,-y,-z+1 #3 x,y,z-1

#4 x-y,x-1,-z #5 -x+y+1,-x+1,z #6 -y+1,x-y,z-1 #7 -x+y+1,-x+1,z-1 #9 x,y,-z+1

#10 -x+1,-y+1,-z+1 #11 1-x,-y,1-z, #12 x-y,-1+x,-z #13 1-y,x-y,-1+z #14 1-x+y,1-x,-1+z
